# Supplementary material
Source: HighWire-hosted journal article supplement (https://bmjopen.bmj.com/content/10/11/e039236)
Supplement: inline-supplementary-material-5 [file inline-supplementary-material-5.pdf]

**Supplementary Equation 1. The final recalibrated model**

$$Z = -0.229 - 0.439 \times \sqrt{\text{agep}} + 0.336 \times \text{age} - 1.808 \times \sqrt{\text{weightp}} + 0.088 \times \text{weight} + \sum \text{coef}$$
